# Supplementary material for: Structural, Evolutionary, and Functional Analysis of the Protein O-Mannosyltransferase Family in Pathogenic Fungi
Source: MDPI journal article supplement (doi:10.3390/jof7050328), 2021-04-23

Tree scale: 1

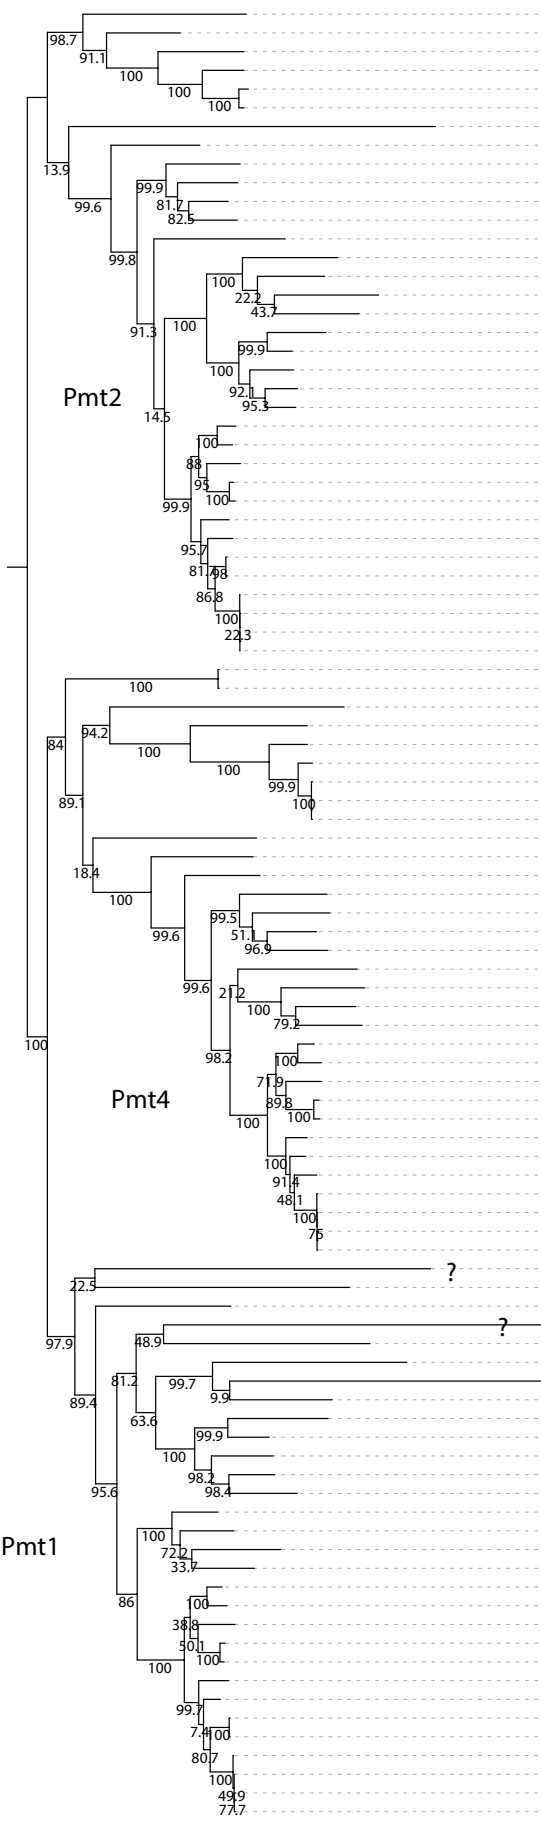

A9VB02\_MONBE\_Choanoflagelata\_Monosiga\_brevicollis  
A0A0D2WM45\_CAPO3\_Holozoa\_Capsaspora\_owczarzaki  
POMT2\_DROME\_Metazoa\_Drosophila\_melanogaster  
F1Q8R9\_DANRE\_Metazoa\_Danio\_rerio  
POMT2\_MOUSE\_Metazoa\_Mus\_musculus  
POMT2\_HUMAN\_Metazoa\_Homo\_sapiens  
A0A058ZEV2\_FONAL\_Holomycota\_Fonticula\_alba  
F4P8T0\_BATDJ\_Fungi\_Batrachochytrium\_dendrobatidis  
E3KXE3\_PUCGT\_Fungi\_Puccinia\_graminis  
A0A0D1DVD8\_USTMA\_Fungi\_Ustilago\_maydis  
D8PUC7\_SCHCM\_Fungi\_Schizophyllum\_commune  
Q5KAF1\_CRYNJ\_Fungi\_Cryptococcus\_neoformans  
PMT2\_SCHPO\_Fungi\_Schizosaccharomyces\_pombe\_972h-  
A0A1B7SM94\_9ASCO\_Fungi\_Ogataea\_polymorpha  
C4R8W7\_KOMPG\_Fungi\_Komagataella\_phaffii  
PMT6\_CANAL\_Fungi\_Candida\_albicans  
PMT6\_YEAST\_Fungi\_Saccharomyces\_cerevisiae\_S288C  
PMT3\_YEAST\_Fungi\_Saccharomyces\_cerevisiae\_S288C  
PMT2\_YEAST\_Fungi\_Saccharomyces\_cerevisiae\_S288C  
PMT2\_CANAL\_Fungi\_Candida\_albicans  
A0A1B7SAN7\_9ASCO\_Fungi\_Ogataea\_polymorpha  
C4R044\_KOMPG\_Fungi\_Komagataella\_phaffii  
A2QPR4\_ASPNC\_Fungi\_AspERGILLUS\_niger  
B6GYU7\_PENRW\_Fungi\_Penicillium\_rubens\_Wisconsin\_54-1255  
KAB8338926.1\_Carpinus\_fangiana  
XP\_023898301.1\_Quercus\_suber  
XP\_023926464.1\_Quercus\_suber  
Q1K4Z4\_NEUCR\_Fungi\_Neurospora\_crassa  
G4MTN1\_MAGO7\_Fungi\_Magnaporthe\_oryzae  
H1W0R0\_COLHI\_Fungi\_Colletotrichum\_higginsianum  
H1VUD6\_COLHI\_Fungi\_Colletotrichum\_higginsianum  
S0DK98\_GIBF5\_Fungi\_Gibberella  
A0A0D2Y4H3\_FUSO4\_Fungi\_Fusarium\_oxysporum\_tomato  
N4UBG2\_FUSC1\_Fungi\_Fusarium\_oxysporum\_wild  
A0A420QXH9\_FUSOX\_Fungi\_Fusarium\_oxysporum\_cubense  
A0A0D2UFH0\_CAPO3\_Holozoa\_Capsaspora\_owczarzaki  
A0A0D2WQD6\_CAPO3\_Holozoa\_Capsaspora\_owczarzaki  
A9UV05\_MONBE\_Choanoflagelata\_Monosiga\_brevicollis  
POMT1\_DROME\_Metazoa\_Drosophila\_melanogaster  
F1Q8R9\_DANRE\_Metazoa\_Danio\_rerio  
POMT1\_HUMAN\_Metazoa\_Homo\_sapiens  
B0R070\_MOUSE\_Metazoa\_Mus\_musculus  
B0R071\_MOUSE\_Metazoa\_Mus\_musculus  
POMT1\_MOUSE\_Metazoa\_Mus\_musculus  
A0A0D2X2N7\_CAPO3\_Holozoa\_Capsaspora\_owczarzaki  
F4P6Q5\_BATDJ\_Fungi\_Batrachochytrium\_dendrobatidis  
A0A086TLD7\_9FUNG\_Fungi\_Mortierella\_verticillata  
E3L255\_PUCGT\_Fungi\_Puccinia\_graminis  
A0A0D1DPS4\_USTMA\_Fungi\_Ustilago\_maydis  
Q5KIZ1\_CRYNJ\_Fungi\_Cryptococcus\_neoformans  
D8Q1K4\_SCHCM\_Fungi\_Schizophyllum\_commune  
PMT4\_SCHPO\_Fungi\_Schizosaccharomyces\_pombe\_972h-  
PMT4\_YEAST\_Fungi\_Saccharomyces\_cerevisiae\_S288C  
PMT4\_CANAL\_Fungi\_Candida\_albicans  
A0A1B7SL58\_9ASCO\_Fungi\_Ogataea\_polymorpha  
A2R8V5\_ASPNC\_Fungi\_AspERGILLUS\_niger  
B6HNL1\_PENRW\_Fungi\_Penicillium\_rubens\_Wisconsin\_54-1255  
KAB8356666.1\_Carpinus\_fangiana  
XP\_023912063.1\_Quercus\_suber  
XP\_023910210.1\_Quercus\_suber  
Q7SD53\_NEUCR\_Fungi\_Neurospora\_crassa  
H1V5G4\_COLHI\_Fungi\_Colletotrichum\_higginsianum  
G4MZFB\_MAGO7\_Fungi\_Magnaporthe\_oryzae  
N4TEN9\_FUSC1\_Fungi\_Fusarium\_oxysporum\_wild  
S0DP21\_GIBF5\_Fungi\_Gibberella  
A0A420RMN3\_FUSOX\_Fungi\_Fusarium\_oxysporum\_cubense  
A0A0D2X980\_FUSO4\_Fungi\_Fusarium\_oxysporum\_tomato  
A0A0D2VQK6\_CAPO3\_Holozoa\_Capsaspora\_owczarzaki  
A0A086TJ69\_9FUNG\_Fungi\_Mortierella\_verticillata  
F4P326\_BATDJ\_Fungi\_Batrachochytrium\_dendrobatidis  
A0A058YZ87\_FONAL\_Holomycota\_Fonticula\_alba  
PMT1\_SCHPO\_Fungi\_Schizosaccharomyces\_pombe\_972h-  
PMT5\_CANAL\_Fungi\_Candida\_albicans  
A0A1B7SM43\_9ASCO\_Fungi\_Ogataea\_polymorpha  
C4QWN8\_KOMPG\_Fungi\_Komagataella\_phaffii  
PMT5\_YEAST\_Fungi\_Saccharomyces\_cerevisiae\_S288C  
PMT1\_YEAST\_Fungi\_Saccharomyces\_cerevisiae\_S288C  
PMT1\_CANAL\_Fungi\_Candida\_albicans  
C4QZ26\_KOMPG\_Fungi\_Komagataella\_phaffii  
A0A1B7SFI6\_9ASCO\_Fungi\_Ogataea\_polymorpha  
D8QLN6\_SCHCM\_Fungi\_Schizophyllum\_commune  
Q5KHK5\_CRYNJ\_Fungi\_Cryptococcus\_neoformans  
E3KAH6\_PUCGT\_Fungi\_Puccinia\_graminis  
A0A0D1CFI0\_USTMA\_Fungi\_Ustilago\_maydis  
A5ABN8\_ASPNC\_Fungi\_AspERGILLUS\_niger  
B6HEJ9\_PENRW\_Fungi\_Penicillium\_rubens\_Wisconsin\_54-1255  
KAB8356587.1\_Carpinus\_fangiana  
XP\_023901965.1\_Quercus\_suber  
XP\_023929032.1\_Quercus\_suber  
G5EHM5\_MAGO7\_Fungi\_Magnaporthe\_oryzae  
H1VTR9\_COLHI\_Fungi\_Colletotrichum\_higginsianum  
V5IRE4\_NEUCR\_Fungi\_Neurospora\_crassa  
V5IP53\_NEUCR\_Fungi\_Neurospora\_crassa  
S0EBA7\_GIBF5\_Fungi\_Gibberella  
N4U5I8\_FUSC1\_Fungi\_Fusarium\_oxysporum\_wild  
A0A0D2XI85\_FUSO4\_Fungi\_Fusarium\_oxysporum\_tomato  
A0A420T1T9\_FUSOX\_Fungi\_Fusarium\_oxysporum\_cubense

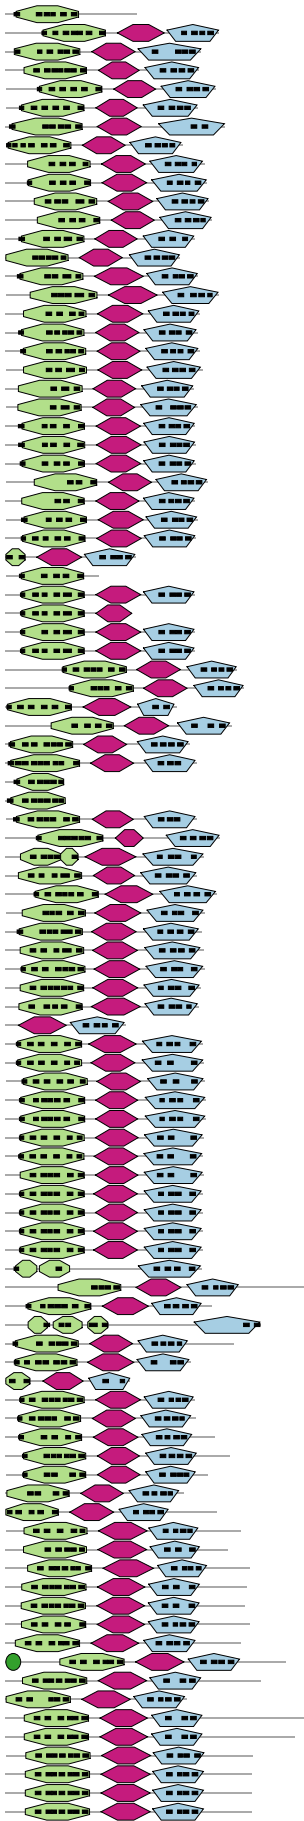

Structural disorder (IUPred)

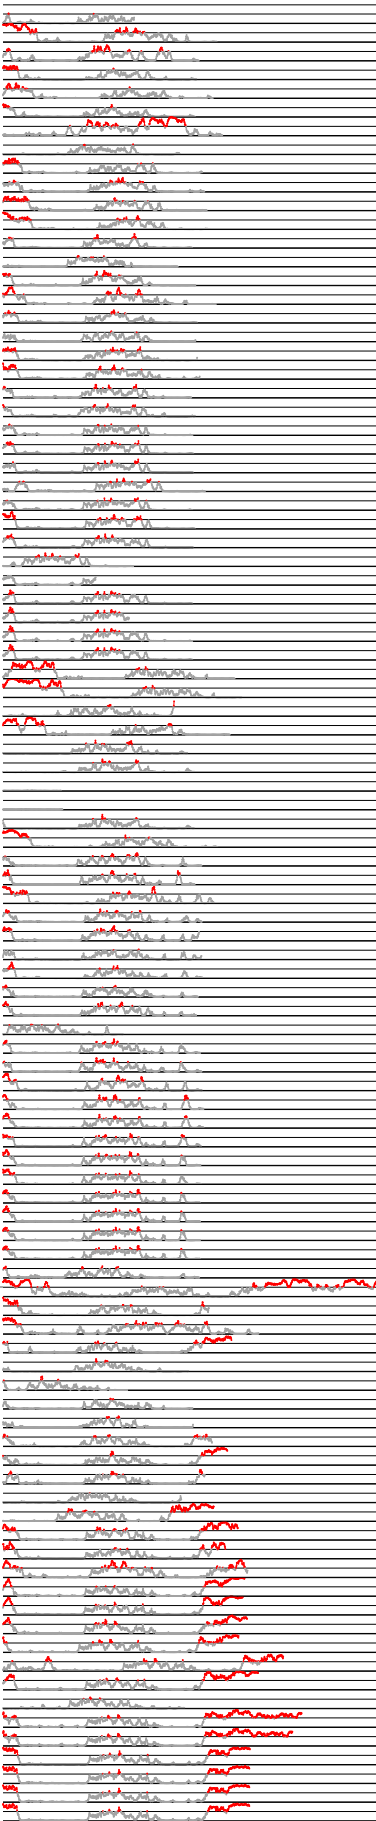

Supplement: s1 [file s1]
