# Supplementary figures and images for: Structural, Evolutionary, and Functional Analysis of the Protein O-Mannosyltransferase Family in Pathogenic Fungi
Source: MDPI journal article supplement (doi:10.3390/jof7050328), 2021-04-23

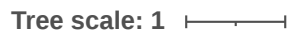

Supplement: s1 [file s1]
